# Supplementary material for: Triple 1D1D superatomic bonding. Au22(dppo)6 as a Π4- and Δ2-triply bonded cluster based on Au11 assembled units
Source: Royal Society of Chemistry journal article supplement (doi:10.1039/c9cp05790k), 2019-12-13
Supplement: c9cp05790k1.pdf [file c9cp05790k1.pdf]

# **Triple 1D $\equiv$ 1D Superatomic Bonding. Au<sub>22</sub>(dppp)<sub>6</sub> as a $\Pi^4$ - and $\Delta^2$ -Triply Bonded Cluster Based on Au<sub>11</sub> Assembled Units**

Alvaro Muñoz-Castro<sup>a\*</sup>

<sup>a</sup>*Grupo de Química Inorgánica y Materiales Moleculares, Facultad de Ingeniería, Universidad Autónoma de Chile, El Llano Subercaseaux 2801, Santiago, Chile.*

Content

Figure S1. 1P and 1D superatomic orbitals along Au<sub>13</sub><sup>5+</sup>, Au<sub>12</sub><sup>4+</sup> and Au<sub>11</sub><sup>3+</sup> bare cores.

Page. S2

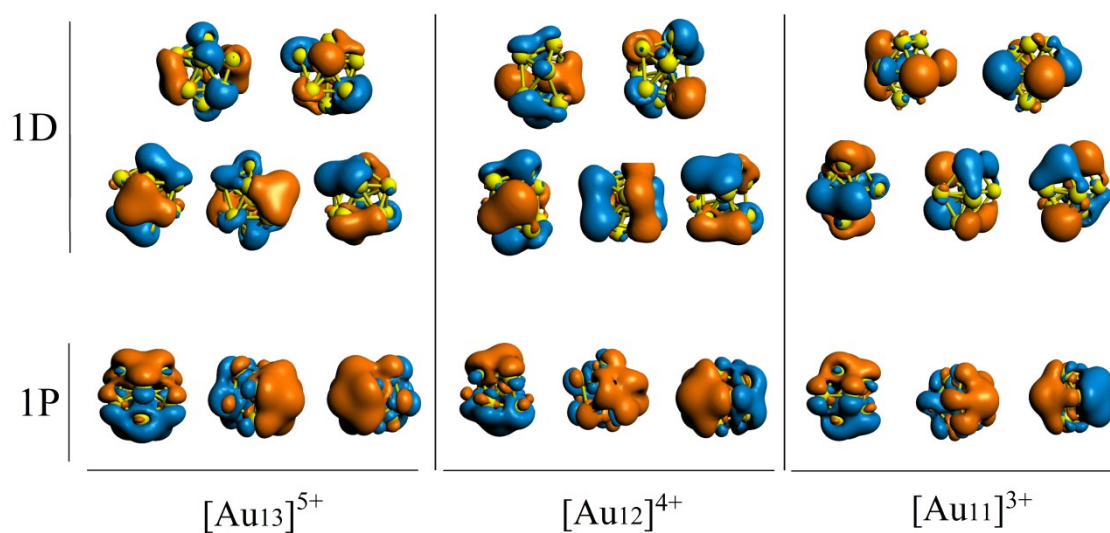

Figure S1. 1P and 1D superatomic orbitals along  $\text{Au}_{13}^{5+}$ ,  $\text{Au}_{12}^{4+}$  and  $\text{Au}_{11}^{3+}$  bare cores, obtained by removing one and two Au vertices respectively from  $\text{Au}_{13}^{5+}$ , denoting the resemblance of their relevant superatomic shells. 1P remains as the highest occupied molecular orbital, and 1D as the lowest unoccupied molecular orbital.
